# Supplementary material for: Sea level rise drives increased tidal flooding frequency at tide gauges along the U.S. East and Gulf Coasts: Projections for 2030 and 2045
Source: PLoS One. 2017 Feb 3;12(2):e0170949. doi: 10.1371/journal.pone.0170949 (PMC5291542; doi:10.1371/journal.pone.0170949)
Supplement: S1 Table — Tidal flooding events per year for all tide gauge locations and sea level rise scenarios evaluated in this study. (XLSX) [file pone.0170949.s001.xlsx]

## Sheet: Sheet1
Supplementary data for Dahl et al.
						Intermediate-Low Scenario						Intermediate-High Scenario						Highest Scenario
State	Tide Gauge	Gauge #	Flooding Threshold (m above MLLW)	2001-2015: events/yr	2001-2015: 1-sigma	2030: SLR (cm)	2030: events/yr	2030: 1-sigma	2045: SLR (cm)	2045: events/yr	2045: 1-sigma	2030: SLR (cm)	2030: events/yr	2030: 1-sigma	2045: SLR (cm)	2045: events/yr	2045: 1-sigma	2030: SLR (cm)	2030: events/yr	2030: 1-sigma	2045: SLR (cm)	2045: events/yr	2045: 1-sigma	Nearest SLR projection	Data gaps (years with more than 5 months missing are excluded from results
MD	Annapolis	8575512	0.73152	37.9333	15.926	8.56488	91.8667	33.0084	17.0691	178.733	51.3148	14.016	147.2	44.8525	30.477	336.467	46.7285	20.2905	218.667	54.4474	44.5587	393.4	23.724		none
FL	Apalachicola	8728690	1.2192	0.533333	0.915475	5.42544	0.666667	1.39728	11.3358	0.866667	1.40746	10.8822	0.866667	1.40746	24.7437	2.2	2.14476	17.1567	1.13333	1.24595	38.8254	10.2	6.28149		none
NJ	Atlantic City	8534720	1.8288	22.2667	10.1592	10.8204	49.2667	18.3438	21.193	100.533	27.6635	16.2961	72.7333	22.1439	34.7015	199.733	47.2946	22.5706	107.933	29.2391	48.6827	334.267	61.891		12/1/07-3/25/08
MD	Baltimore	8574680	0.9144	11.7333	7.55425	8.26008	25.8	12.5709	16.4656	62.8	21.9226	13.7164	47.4667	17.6022	29.974	185.067	42.7057	19.9909	87.8667	27.6402	43.9552	346.6	42.2827		none
MS	Bay Waveland YC	8747437	0.97536	10.9	5.70477	6.4008	6.57143	3.47993	13.1463	13.9286	6.81022	11.8657	33.1	14.1221	26.5542	98.2	25.5029	18.1402	19.0714	9.11857	40.6359	112.643	38.6674	Pensacola	none
NY	Bergen Point	8519483	2.19456	9.6	5.12417	8.16864	19.8	8.68971	16.365	36.7	15.4851	13.6457	31.4	13.5056	29.7729	100.933	28.4114	19.9202	53.7	17.9323	43.8546	213	30.3937	The Battery	none
MA	Boston	8443970	3.81	6.06667	4.35015	7.34568	20.3333	10.2167	14.8563	38	14.8565	12.815	18.8	11.8575	28.2641	53.8	20.5399	19.0895	52.8	17.5792	42.3459	212.2	44.2092		none
CT	Bridgeport	8467150	2.71272	13.5333	8.49257	7.55904	12.4	8.95864	15.2586	21.5333	11.8856	13.0085	44.6667	17.467	28.6664	123.933	36.4034	19.283	29.6	14.5592	42.6476	106.333	31.8247		none
MD	Cambridge	8571892	1.0668	6.6	4.11964	9.47928	27.4667	13.5059	18.779	53	19.8062	14.9394	33.5333	13.5745	32.1869	181.467	61.2289	21.2138	70.4667	21.57	46.2686	242.4	49.6298		none
NJ	Cape May	8536110	2.04216	28.8667	11.7648	10.729	19.4667	9.10939	21.0925	49.5333	20.3395	16.2053	99	29.7538	34.5003	250.467	51.5071	22.4798	63	25.7931	48.5821	401.4	63.6775		1/15/2006-6/20/2006
SC	Charleston	8665530	2.1336	24	12.1597	7.86384	68.3333	23.5119	15.7615	133.067	35.8099	13.3227	74.6	27.3072	29.1694	179.4	46.881	19.5972	143.133	37.8151	43.2511	394.467	60.8028		none
FL	Clearwater Beach	8726724	1.524	0.0666667	0.258199	7.28472	49.4	19.4525	14.7557	87.5333	30.7429	12.7559	0.8	1.26491	28.1635	4.4	3.33381	19.0304	107.533	35.3248	42.2453	330.133	62.7431		1/1/01-4/30/01, 2/1/2004-5/31/2004
NC	Duck	8651370	1.6764	6.06667	4.06143	11.43	0.333333	0.48795	22.2995	0.866667	1.24595	16.8976	25.8	8.59568	35.8079	105.6	26.8376	23.1721	1.33333	1.67616	49.7891	33.6	16.9318	Sewells Point	12/4/2009-3/22/2010
TX	Eagle Point	8771013	1.2192	0.2	0.414039	14.0513	16.2667	6.3748	27.1275	40.0667	13.6668	19.5205	1.13333	1.30201	40.5354	9.2	8.78473	25.795	42.4667	14.0044	54.6171	232.267	42.5146	Galv. Pier 21	none
FL	Fernandina Beach	8720030	2.5908	1.92857	2.94734	6.52272	0.666667	0.723747	13.3475	2.33333	2.52605	11.9925	9.2	6.5378	26.7553	40.1333	15.0232	18.267	2.06667	2.18654	40.8371	35.6667	21.6388		11/1/2001-4/30/2002
GA	Ft. Pulaski	8670870	2.80416	8.06667	6.9741	8.35152	5.53333	5.70547	16.6668	10.8667	6.37928	13.8294	34.6	15.6835	30.1752	103.733	32.8796	20.1039	18.1333	8.36546	44.1564	106.667	30.7749		2/12/02-3/31/03
TX	Galveston Pier 21	8771450	1.2192	0.133333	0.351866	14.0513	20.4	11.7279	27.1275	42.8667	16.4702	19.5205	1.6	1.80476	40.5354	11.1333	8.79827	25.795	56.5333	19.5114	54.6171	206	50.1711		none
FL	Key West	8724580	0.88392	3.26667	4.19977	7.1628	0.8	1.08233	14.5694	2.6	2.87352	12.6187	41.4	23.2619	27.8587	195.6	50.9983	18.8976	2.26667	2.43389	41.9405	46.4667	22.9561		none
NY	Kings Point	8516945	2.8956	14.9286	7.46751	8.16864	18.0667	16.2501	16.365	52.9333	27.1805	13.6457	39	16.6519	29.7729	108.867	30.9582	19.9202	85.4	35.8006	43.8546	411.667	71.441	The Battery	none
VA	Kiptopeke	8632200	1.3716	7.85714	4.6053	9.08304	26.7333	12.5041	18.0749	48.9333	17.9542	14.5553	28.5714	9.79572	31.4828	117.857	31.564	20.8298	61.2667	21.0525	45.5646	213.867	47.7177		no data 2001-2002
LA	Lawma, Amerada Pass	8764227	1.0668	0	0	18.8062	16.4	6.76773	35.8783	35.8	12.2378	24.2603	0.6	1.07497	49.2862	4.8	2.97396	30.5348	46	15.6205	63.2673	277.2	57.1349	Grand Isle	none
DE	Lewes	8557380	1.8288	20	7.98212	9.02208	0.3	0.674949	17.8738	1.2	1.75119	14.4847	66.8	21.1194	31.3822	184.4	38.9776	20.7592	0.8	1.13529	45.3634	19.4	9.39503		6/1/15-9/30/15
VA	Lewisetta	8635750	0.9144	8.86667	5.80476	12.5273	42.6667	14.1606	24.3112	82.8667	24.1864	17.9906	60.5333	26.6937	37.719	312.6	82.831	24.2651	100.333	27.4972	51.8008	324.733	47.2221		none
FL	Mayport	8720218	1.95072	6.4	6.95701	6.52272	33.3333	15.9538	13.3475	111.6	47.3887	11.9925	27.4	13.6894	26.7553	100.933	36.8384	18.267	110	47.0167	40.8371	499.667	48.6058	Fernandina Bch.	none
NY	Montauk	8510560	1.3716	1.66667	1.79947	8.77824	14.4	9.73066	17.4714	32.2	15.2793	14.2467	6.13333	3.70071	30.9799	34.4667	15.4544	20.5212	52.6	22.36	44.961	239.733	62.8825		11/4/03-10/28/04
MA	Nantucket Island	8449130	1.8288	0.4	0.910259	8.80872	3.8	2.5967	17.572	8.86667	5.1251	14.2747	1.6	1.68184	30.9799	6.86667	4.92612	20.5492	11.4667	6.46824	44.961	123.533	41.6805		data begins in 2010
CT	New Haven	8465705	2.62128	4.4	3.62137	7.55904	0.8	1.32017	15.2586	2.13333	1.88478	13.0085	12.6667	12.4652	28.6664	49.0667	36.8694	19.283	2.73333	2.43389	42.6476	33	19.3132	Bridgeport	1/1/2001-9/30/2001
CT	New London	8461490	1.524	1.46667	1.45733	7.68096	7.13333	7.6706	15.4598	15.6	14.6911	13.1382	4.93333	2.81493	28.8676	25	12.0771	19.4127	23.2667	20.6483	42.9494	118.533	81.132		none
RI	Newport	8452660	1.9812	0.0666667	0.258199	7.68096	2.93333	1.75119	15.4598	6.4	3.7569	13.1463	0.733333	0.96115	28.8676	4.6	3.69942	19.4208	9.66667	5.06623	42.9494	99.9333	33.4482		8/1/2007-12/31/2007
MD	Ocean City	8570283	1.2192	5.53846	4.0128	9.02208	0.466667	0.833809	17.8738	0.933333	1.2228	14.4847	23.1538	7.70115	31.3822	139.308	36.4997	20.7592	1.46667	1.35576	45.3634	21.0667	11.5787	Lewes	none
FL	Panama City	8729108	1.09728	0.266667	0.798809	5.42544	13.1538	5.98395	11.3358	33.1538	11.5242	10.8822	0.733333	1.16292	24.7437	2.66667	2.52605	17.1567	45.5385	15.2568	38.8254	358.385	61.7219	Apalachicola	none
PA	Philadelphia	8545240	2.49936	11.8667	12.1471	9.6012	0.333333	0.723747	18.9802	0.8	1.14642	15.0541	48	28.4655	32.388	164.667	52.7754	21.3286	0.933333	1.43759	46.4698	15	9.48683	Reedy Point	none
ME	Portland	8418150	3.6576	6.46667	5.04079	5.27304	29.1333	19.7552	11.0341	67.8667	37.1712	10.7384	17.6667	11.5367	24.4419	46.1333	18.9957	17.0129	82.4	42.2202	38.5237	316.133	66.2224		data begin 2004
RI	Quonset Point	8454049	2.1336	0	0	7.68096	11.3333	8.03267	15.4598	17.8667	11.4945	12.3261	0.133333	0.351866	27.3588	1.53333	1.76743	18.6006	28.6	14.2468	41.4406	96.2667	30.6069	Newport	1/20/14-11/20/14
DE	Reedy Point	8551910	2.19456	9.93333	7.1959	9.6012	0	0	18.9802	0.2	0.414039	15.0541	53.7333	27.9476	32.388	206.667	56.6892	21.3286	0.4	0.507093	46.4698	7.73333	5.21627		none
TX	Rockport	8774770	0.67056	0.4	1.0556	13.7465	30.3333	17.1492	26.524	78.2667	35.989	19.1992	3.66667	3.73529	40.0324	37	14.9809	25.4737	94.2	40.7697	54.0136	390.867	64.4181		none
TX	Sabine Pass	8770570	1.0668	0.533333	0.833809	12.5273	2.06667	2.91466	24.3112	10	9.26591	17.9871	7.4	7.73489	37.719	61.6	33.6129	24.2616	8.13333	7.12006	51.8008	96.5333	22.3059		none
NJ	Sandy Hook	8531680	2.04216	23	10.2609	8.16864	3.53333	4.65781	16.365	13.8667	12.1177	13.6457	66.0667	23.4017	29.7729	169.2	42.4789	19.9202	13.8667	12.1177	43.8546	195	58.8788	The Battery	none
VA	Sewells Point	8638610	1.3716	7.26667	4.35015	11.43	44.2667	16.425	22.2995	78.6667	24.9562	16.8976	30.2	11.7546	35.8079	139.533	46.4218	23.1721	98.4	29.2985	49.7891	303.467	53.7745		none
SC	Springmaid Pier	8661070	2.286	3	4.83576	9.17448	20.4667	9.16411	18.1755	48.6667	18.8932	14.6304	12.7143	8.82678	31.5834	56.5714	22.1002	20.918	52.6	20.646	45.6651	324.467	74.9732		none
FL	St. Petersburg	8726520	1.524	0.0666667	0.258199	7.52856	7.13333	6.85846	15.158	18.1333	10.7059	12.9878	0.2	0.774597	28.5659	0.933333	1.2228	19.2623	23.1333	12.9269	42.6476	114.933	37.3257		none
NY	The Battery	8518750	2.19456	3.28571	2.55489	8.16864	0.0666667	0.258199	16.365	0.333333	0.816497	13.6457	11.0714	5.31275	29.7729	43.5714	18.135	19.9202	0.466667	0.915475	43.8546	3	1.64751		none
MD	Tolchester Beach	8573364	1.0668	2.73333	2.37447	8.26008	5.8	4.7238	16.4656	14.2	8.96182	13.7164	11	7.36788	29.974	56.9333	22.7893	19.9909	20.2	12.155	43.9552	176.933	50.3991	Baltimore	none
TX	USCG Freeport	8772447	1.2192	0.142857	0.363137	17.7698	1.33333	2.09132	33.9672	10.2667	11.693	23.2227	2.28571	3.02372	47.3751	64	24.8697	29.4972	7.8	6.19363	61.4568	162.2	36.5129	Freeport	none
FL	Vaca Key	8723970	0.762	0.333333	0.723747	8.29056	1.2	2.14476	16.5662	10.5333	13.2927	13.753	5.73333	9.46019	29.974	80.5333	36.5862	20.0275	20.3333	18.5883	44.0558	254.4	54.1886		none
FL	Virginia Key	8723214	1.0668	5.06667	7.92344	8.29056	22.2	18.7281	16.5662	63.8	36.0301	13.753	46	28.5257	29.974	205.933	82.76	20.0275	89.2667	45.9106	44.0558	476.8	95.0678	Vaca Key	data starts 2006
VA	Wachapreague	8631044	1.9812	5.85714	3.53217	9.08304	11.4286	3.77964	18.0749	21.1429	3.38765	14.5553	15.2857	3.25137	31.4828	61.5714	15.831	20.8298	26.4286	4.57738	45.5646	156	39.4124	Kiptopeke	data starts 2/2006
DC	Washington, DC	8594900	1.28016	33.7857	15.1514	8.35152	74.4286	28.2889	18.0749	167.786	50.9678	13.823	120.214	43.0048	30.1752	337.214	64.8076	20.0975	195.571	56.807	44.1564	503.5	54.5735		none
NC	Wilmington	8658120	1.6764	42.8	27.3214	6.30936	82.3333	45.1231	12.9452	138.533	61.2767	11.781	127.267	58.5424	26.353	323.733	82.5361	18.0555	200.733	72.927	40.4348	536.733	68.6705		none
VA	Windmill Point	8636580	0.9144	5	3.38062	12.5273	19.5333	9.70174	24.3112	64.4	30.0566	17.9906	35.3333	17.1367	37.719	216.2	89.78	24.2651	64.2667	30.1033	51.8008	432.8	102.814	Lewisetta	none
MA	Woods Hole	8447930	1.6764	0.0666667	0.258199	7.74192	0.0666667	0.258199	15.5603	0.0666667	0.258199	13.2117	0.0666667	0.258199	28.9682	0.2	0.560612	19.4862	0.0666667	0.258199	43.05	1.33333	1.34519		data starts 10/006
NC	Wrightsville Beach	8658163	1.8288	8.63636	5.57266	6.30936	17.3636	6.63736	12.9452	32.1818	13.4671	11.781	29.2727	11.6455	26.353	86.1818	27.0104	18.0555	48.7273	17.6414	40.4348	188.091	47.7503	Wilmington	none
